# Supplementary material
Source: bioRxiv or medRxiv preprint supplement (https://www.biorxiv.org/highwire/filestream/142138/field_highwire_adjunct_files/0/474528-1.pdf)

**Figure S1: ZIP4 mediates H<sup>+</sup> coupled Zn<sup>2+</sup> transport.** (A,B) Representative traces of HEK293-T cells transfected with ZIP4 (blue) or a control vector (black), loaded with 1 μM BCECF-AM, and monitored for cytoplasmic pH changes at pH7.4 (A) or pH5 (B), in absence of Zn<sup>2+</sup>. (C) Normalized H<sup>+</sup> transport rates recorded from control (black) or ZIP4 (blue) expressing cells, at the indicated pH.

# Supplementary figure 1

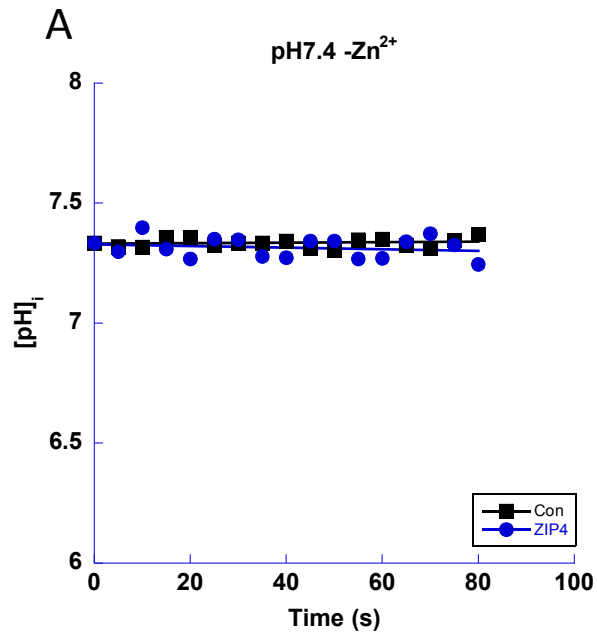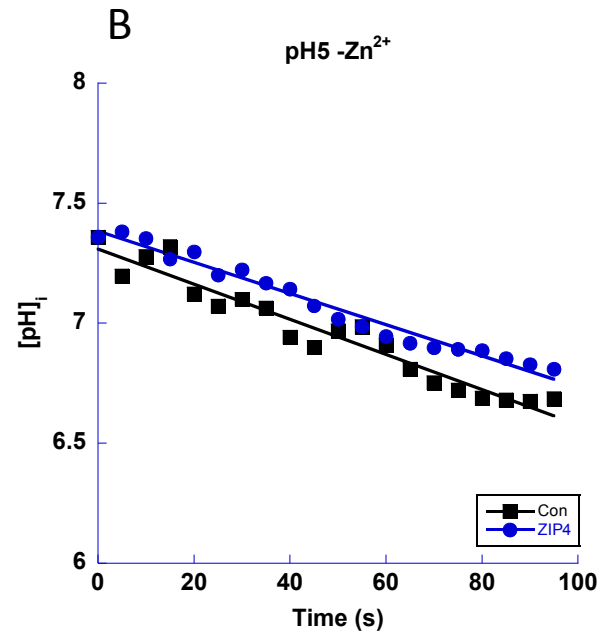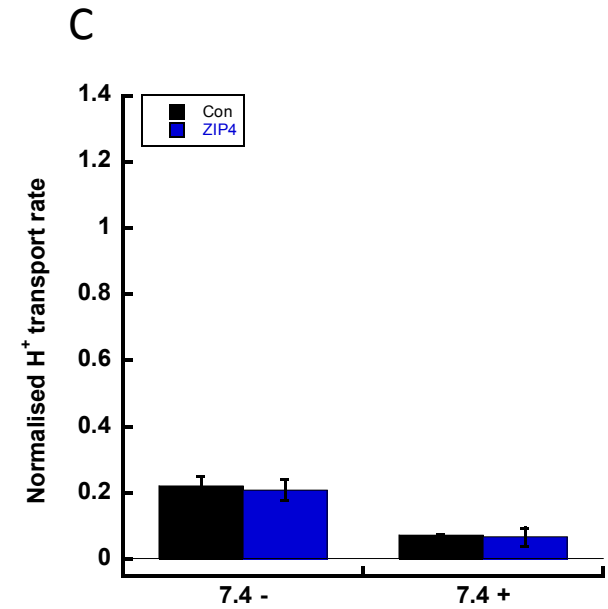

Supplement: Supplementary file [file 474528-1.pdf]
